# Supplementary material for: A Floating Capsule Electrochemical System for In Situ and Multichannel Ion-Selective Sensing
Source: MDPI journal article supplement (doi:10.3390/bios13100914), 2023-10-05
Supplement: s1 [file s1]

## S1. Chemicals and Materials

Na ionophore X, Mg ionophore I, and Ca ionophore IV (ETH 5324) were obtained from Sigma-Aldrich Inc. (USA). Nonactin, 2-nitrophenyl octyl ether (2-NPOE), and tetrahydrofuran were obtained from Shanghai Aladdin Bio-Chem Technology Co., Ltd. (Shanghai, China). Bis(2-ethylhexyl) sebacate (DOS) was obtained from TCI (Shanghai) Co., Ltd. (Shanghai, China). Potassium tetrakis(4-chlorophenyl)borate (KTPClPB) was obtained from Alfa Aesar China Chemical Co., Ltd. (Shanghai, China). Valinomycin, sodium tetrakis[3,5-bis(trifluoromethyl)phenyl]borate (Na-TFPB), polyvinyl chloride (PVC, K-value: 68–65), sodium chloride (NaCl), potassium chloride (KCl), magnesium chloride ( $\text{MgCl}_2$ ), calcium chloride ( $\text{CaCl}_2$ ), ammonium chloride ( $\text{NH}_4\text{Cl}$ ), magnesium sulfate ( $\text{MgSO}_4$ ), sodium bicarbonate ( $\text{NaHCO}_3$ ), and sodium dihydrogen phosphate ( $\text{NaH}_2\text{PO}_4$ ) were obtained from Shanghai Macklin Biochemical Technology Co., Ltd. (Shanghai, China).  $\text{Ti}_3\text{C}_2$  (5 mg/ml) was obtained from Shandong Xiyan New Material Technology Co., Ltd. (Shandong, China). Poly(3,4-ethylenedioxythiophene) polystyrene sulfonate (PEDOT:PSS) conducting polymer solution was obtained from Beijing J&K Scientific Co., Ltd. (Beijing, China). PDMS (Sylgard 184) was obtained from Dow Corning, Inc. (USA) to seal the electronic items. All solutions were prepared using distilled water purchased from Watsons (Shanghai, China).

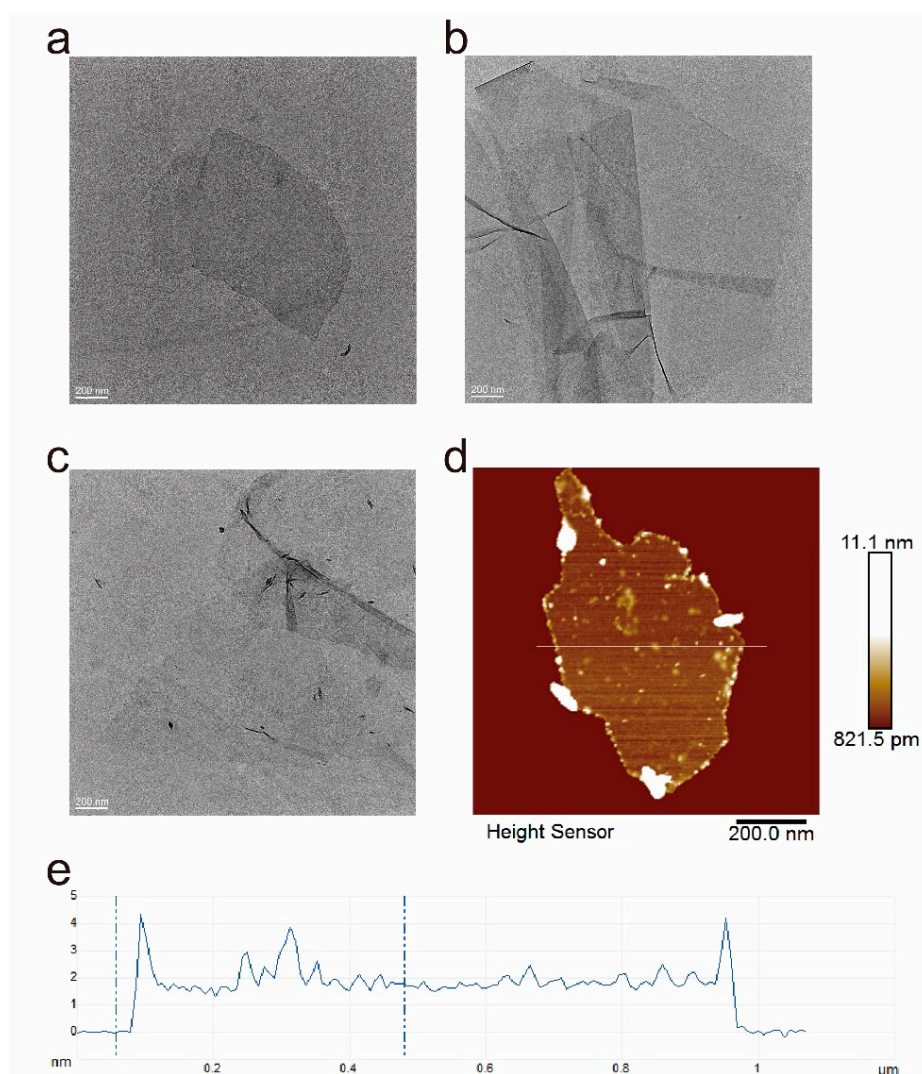

**Figure S1.** (a-c) TEM photograph of  $\text{Ti}_3\text{C}_2$ ; (d) AFM photograph of  $\text{Ti}_3\text{C}_2$ ; (e) the thickness data for  $\text{Ti}_3\text{C}_2$  at the white line in (d).

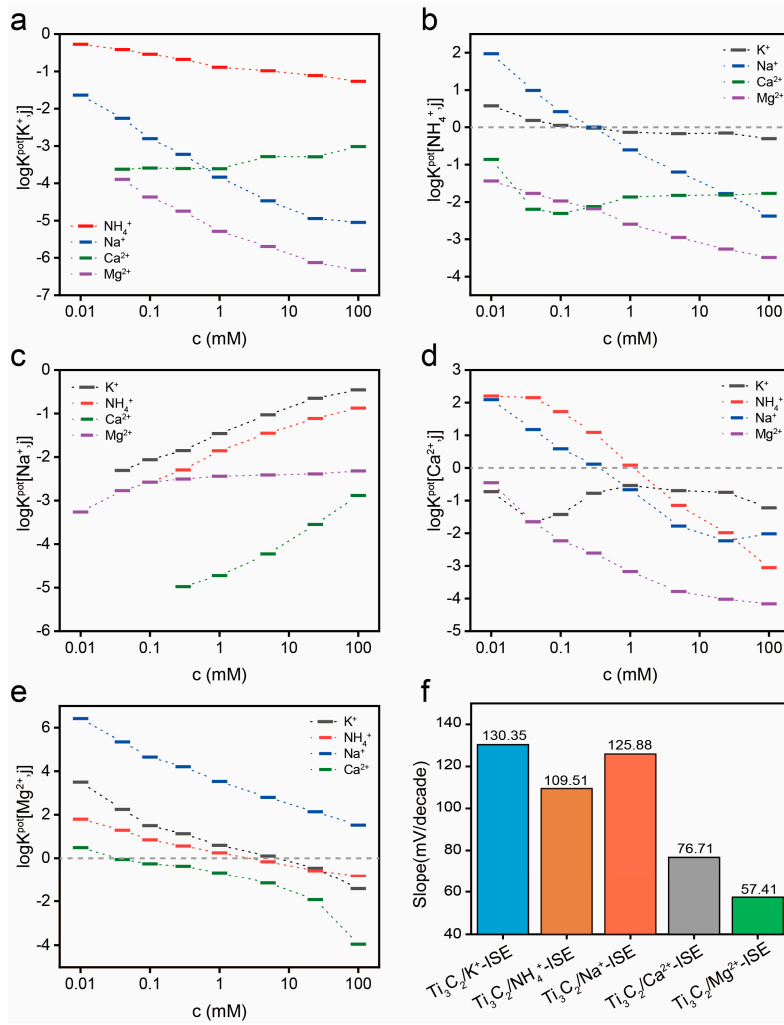

**Figure S2.** (a-e) Selectivity coefficients of the five  $Ti_3C_2$ -based ISEs for four other ions at different concentrations; (f) response slopes of the five  $Ti_3C_2$ -based ISEs.

**Table S1.** The response slope of PEDOT:PSS-based and  $Ti_3C_2$ -based SC-ISEs.

|     | SC-ISE                             | Response Slope (mV/decade) |
|-----|------------------------------------|----------------------------|
| T=3 | PCB-Au/PEDOT:PSS/ $Ca^{2+}$ -ISE   | $75.42 \pm 1.32$           |
|     | PCB-Au/ $Ti_3C_2$ / $Ca^{2+}$ -ISE | $76.44 \pm 0.45$           |
|     | PCB-Au/PEDOT:PSS/ $K^+$ -ISE       | $125.69 \pm 3.18$          |
|     | PCB-Au/ $Ti_3C_2$ / $K^+$ -ISE     | $127.49 \pm 0.99$          |
| N=3 | PCB-Au/PEDOT:PSS/ $Ca^{2+}$ -ISE   | $76.02 \pm 0.42$           |
|     | PCB-Au/ $Ti_3C_2$ / $Ca^{2+}$ -ISE | $76.64 \pm 0.99$           |
|     | PCB-Au/PEDOT:PSS/ $K^+$ -ISE       | $124.13 \pm 5.45$          |
|     | PCB-Au/ $Ti_3C_2$ / $K^+$ -ISE     | $126.03 \pm 3.11$          |

**Table S2.** The response slope of the five  $Ti_3C_2$ -based SC-ISEs.

| SC-ISE                            | Response Slope (mV/decade) | $R^2$  |
|-----------------------------------|----------------------------|--------|
| PCB-Au/ $Ti_3C_2$ / $K^+$ -ISE    | $115.48 \pm 0.99$          | 0.9954 |
| PCB-Au/ $Ti_3C_2$ / $NH_4^+$ -ISE | $96.82 \pm 0.57$           | 0.9937 |

|                                                               |               |        |
|---------------------------------------------------------------|---------------|--------|
| PCB-Au/ Ti <sub>3</sub> C <sub>2</sub> /Na <sup>+</sup> -ISE  | 128.25 ± 0.44 | 0.9994 |
| PCB-Au/ Ti <sub>3</sub> C <sub>2</sub> /Ca <sup>2+</sup> -ISE | 76.44 ± 0.45  | 0.9993 |
| PCB-Au/Ti <sub>3</sub> C <sub>2</sub> /Mg <sup>2+</sup> -ISE  | 51.64 ± 0.63  | 0.9984 |

**Table S3.** The recipe of MEM.

| Inorganic Salts                                                                    | Molecular Weight | Concentration (mg/L) | mM    |
|------------------------------------------------------------------------------------|------------------|----------------------|-------|
| Calcium chloride (CaCl <sub>2</sub> )                                              | 111.0            | 200.0                | 1.8   |
| Magnesium sulfate (MgSO <sub>4</sub> )                                             | 120.0            | 97.67                | 0.8   |
| Potassium chloride (KCl)                                                           | 75.0             | 400.0                | 5.3   |
| Sodium bicarbonate (NaHCO <sub>3</sub> )                                           | 84.0             | 2200.0               | 26.2  |
| Sodium chloride (NaCl)                                                             | 58.0             | 6800.0               | 117.2 |
| Sodium phosphate monobasic<br>(NaH <sub>2</sub> PO <sub>4</sub> -H <sub>2</sub> O) | 138.0            | 140.0                | 1.0   |
